# Supplementary material
Source: PubMed Central journal article supplement (PMC2764895)
Supplement: 0908994106_0908994106SI.pdf [file 0908994106_0908994106SI.pdf]

# Supporting Information

Tamietto et al. 10.1073/pnas.0908994106

Table S1. Recognition accuracy in D.B. as a function of visual field, emotion, and type of expression

| Emotion   | Visual Field  |               |               |               |
|-----------|---------------|---------------|---------------|---------------|
|           | LVF (blind)   |               | RVF (intact)  |               |
| Happiness | Face          | Body          | Face          | Body          |
|           | 27/32 (84.4%) | 28/32 (87.5%) | 28/32 (87.5%) | 29/32 (90.6%) |
| Fear      | Face          | Body          | Face          | Body          |
|           | 28/32 (87.5%) | 29/32 (90.6%) | 29/32 (90.6%) | 30/32 (93.8%) |

**Table S2. Recognition accuracy in G.Y. as a function of visual field, emotion, and type of expression**

| Emotion   | Visual Field  |               |               |               |
|-----------|---------------|---------------|---------------|---------------|
|           | LVF (intact)  |               | RVF (blind)   |               |
| Happiness | Face          | Body          | Face          | Body          |
|           | 26/32 (81.3%) | 30/32 (93.8%) | 25/32 (78.1%) | 22/32 (68.8%) |
| Fear      | Face          | Body          | Face          | Body          |
|           | 28/32 (87.5%) | 27/32 (84.4%) | 23/32 (71.9%) | 24/32 (75%)   |
